# Supplementary material for: New ultraviolet transparent rare-earth borates with enhanced birefringence induced by cation chemical substitution
Source: Royal Society of Chemistry journal article supplement (doi:10.1039/d4qi00840e), 2024-01-01
Supplement: d4qi00840e1.pdf [file d4qi00840e1.pdf]

## Supporting Information

### **New Ultraviolet Transparent Rare-Earth Borates with Enhanced Birefringence Induced by Cation Chemical Substitution**

*Guanglian Sun,<sup>†</sup> Xiaofang Qi,<sup>†\*</sup> WuHongping Wu,<sup>†\*</sup> Zhanggui Hu,<sup>†</sup> Jiyang Wang,<sup>†</sup> and Yicheng Wu<sup>†</sup>*

*<sup>†</sup>Tianjin Key Laboratory of Functional Crystal Materials, Institute of Functional Crystal, Tianjin University of Technology, Tianjin 300384, China.*

---

## CONTENTS

|                                                                                                   |    |
|---------------------------------------------------------------------------------------------------|----|
| Experimental.....                                                                                 | 3  |
| Table S1. Crystal data and structure refinement for three compounds.....                          | 5  |
| Table S2. Atoms coordinates, equivalent isotropic displacement parameters for three compounds...6 |    |
| Table S3. Selected bond distances (Å) and angles (deg) for three compounds.....                   | 8  |
| Table S4. Summary of Y-based borates with isolated BO <sub>3</sub> .....                          | 14 |
| Table S5. Muliken bond population and selected bond distances of three compounds.....             | 15 |
| Fig. S1 The six membered rings in three compounds.....                                            | 16 |
| Fig. S2 Cation coordination environment and linkage modes of three compounds.....                 | 17 |
| Fig. S3 Thermal behaviour of three compounds. ....                                                | 18 |
| Fig. S4 X-ray diffraction patterns of three compounds.....                                        | 19 |
| Fig. S5 The calculated band structures of three compounds.....                                    | 20 |
| Fig. S6 Crystal thickness of three compounds.....                                                 | 21 |

---

## Experimental Procedures

### Reagents

$\text{Li}_2\text{CO}_3$  (Aladdin Reagent Co., Ltd, 99%),  $\text{Na}_2\text{CO}_3$  (Macklin Reagent Co., Ltd, 99.5%),  $\text{Rb}_2\text{CO}_3$  (Shanghai Industrial Co., Ltd, 99.9%),  $\text{Cs}_2\text{CO}_3$  (Shanghai Industrial Co., Ltd, 99.9%),  $\text{SrCO}_3$  (Macklin Reagent Co., Ltd, 99.5%),  $\text{Y}_2\text{O}_3$  (Aladdin Reagent Co., Ltd, 99.99%),  $\text{H}_3\text{BO}_3$  (Aladdin Reagent Co., Ltd, 99.5%) were obtained from commercial sources and utilized without further purification.

### Synthesis

The polycrystalline samples were synthesized through conventional solid-state reactions. Stoichiometric amounts of  $\text{Li}_2\text{CO}_3$ ,  $\text{Na}_2\text{CO}_3$ ,  $\text{Rb}_2\text{CO}_3$ ,  $\text{SrCO}_3$ ,  $\text{Y}_2\text{O}_3$  and  $\text{H}_3\text{BO}_3$  were thoroughly ground and placed in platinum crucibles. The mixture were heated at  $400^\circ\text{C}$  for 10 h to facilitate the decomposition of  $\text{H}_2\text{O}$  and  $\text{CO}_2$ . Then the temperature was gradually raised to  $800^\circ\text{C}$  for  $\text{LiNa}_2\text{Y}(\text{BO}_3)_2$ ,  $\text{RbSrY}(\text{BO}_3)_2$  and  $700^\circ\text{C}$  for  $\text{RbNa}_2\text{Y}(\text{BO}_3)_2$  and held for 48h with several intermittent grindings. Powder X-ray diffraction (XRD) analysis confirmed the successful synthesis of pure powders corresponding to these three compounds.

### Crystal Growth

The single crystals were prepared using a high-temperature solution method. For  $\text{LiNa}_2\text{Y}(\text{BO}_3)_2$ , a mixture of  $\text{Li}_2\text{CO}_3$  (0.0722g),  $\text{Na}_2\text{CO}_3$  (0.1224 g),  $\text{Cs}_2\text{CO}_3$  (0.6364g),  $\text{Y}_2\text{O}_3$  (0.1103g), and  $\text{H}_3\text{BO}_3$  (0.1812g) was placed in a vertical programmable temperature furnace. Then, the furnace was heated to  $830^\circ\text{C}$  and kept for 2 h to ensure complete and homogeneous melting of the solution. Subsequently, the solution was slowly cooled to  $650^\circ\text{C}$  at a rate of  $5^\circ\text{C h}^{-1}$ . Similarly, the crystals of  $\text{RbNa}_2\text{Y}(\text{BO}_3)_2$  were obtained using the same temperature programs as that for  $\text{LiNa}_2\text{Y}(\text{BO}_3)_2$  with a mixture of  $\text{Rb}_2\text{CO}_3$  :  $\text{Na}_2\text{CO}_3$  :  $\text{Y}_2\text{O}_3$  :  $\text{H}_3\text{BO}_3$  in the molar ratios of 4: 2 : 1 : 6. The  $\text{Rb}_2\text{CO}_3$  (4mol),  $\text{SrCO}_3$  (2mol),  $\text{Y}_2\text{O}_3$  (1mol) and  $\text{H}_3\text{BO}_3$  (6mol) were thoroughly mixed and then poured into a Pt crucible to prepare  $\text{RbSrY}(\text{BO}_3)_2$ . Then, the mixture was subjected to heating at  $900^\circ\text{C}$  for 2 h followed by slow cooling at a rate of  $5^\circ\text{C h}^{-1}$  until reaching  $750^\circ\text{C}$ . Small crystals were obtained for structure determination. A large number of single crystals of micron scale were obtained and used for structure determination.

### Single Crystal X-ray Diffraction

Single-crystal data was collected on a Bruker SMART APEX III 4 K CCD diffractometer using Mo- $K\alpha$  ( $\lambda = 0.71073 \text{ \AA}$ ) radiation at 293(2) K. The structure of three crystals were solved directly by the SHELXTL crystallographic software package and all atoms were refined by the full-matrix least squares technique. The final structures were examined for the presence of any missing symmetry elements using PLATON, and no additional higher symmetry elements were identified. The crystal data and structure refinement details are listed in Table S1 and the atomic coordination, displacement parameters, bond valence sums (BVSs), and selected bond lengths and angles are summarized in Tables S2 and S3.

### Powder X-ray Diffraction

Powder X-ray diffraction (PXRD) measurements for three polycrystalline materials were performed on a Smart Lab 9KW X-ray diffractometer equipped with Cu  $K\alpha$  radiation ( $\lambda = 1.540598 \text{ \AA}$ ) at room temperature, and the data were acquired through the  $2\theta$  angular range of  $10\text{-}70^\circ$  with a scan step width of  $0.01^\circ$  and a step time of 2s.

The powder XRD patterns of all compounds showed good agreement with the calculated XRD patterns from the single-crystal models (Fig. S4).

### Infrared Spectroscopy

The infrared (IR) spectra were recorded using a Nicolet iS50 FT-IR spectrometer at room temperature in the range of 500-4000  $\text{cm}^{-1}$  for  $\text{LiNa}_2\text{Y}(\text{BO}_3)_2$  and  $\text{RbNa}_2\text{Y}(\text{BO}_3)_2$ , 500-3000  $\text{cm}^{-1}$  for  $\text{RbSrY}(\text{BO}_3)_2$ .

### UV-vis-NIR Diffuse Reflectance Spectroscopy and Transmission Spectrum

Reflectance spectra of the three compounds were collected using a Hitachi UV-VIS-NIR spectrophotometer in the range 190-2000 nm at room temperature. The Kubelka-Munk function:  $F(R) = (1-R)^2 / 2R = K/S$  (where  $R$  represents the reflectance,  $K$  is the absorption, and  $S$  is the scattering) was used to convert the reflectance spectra to the absorbance data.

### Thermal Stability

Differential scanning calorimetry (DSC) were measured by a STA449F5 DSC analyser (NETZSCH Instruments). The samples were placed in a platinum crucible and heated at a rate of 5  $^\circ\text{C}/\text{min}$  from room temperature to 900  $^\circ\text{C}$ , then cooled down to room temperature with the cooling rate of 5  $^\circ\text{C}/\text{min}$  under a nitrogen atmosphere.

### The Birefringence Measurement

The birefringence of three crystals was determined by employing a Nikon Eclipse polarizing microscope E200MV POL equipped with a visible-light filter. Following the equation:  $R = \Delta n \times d$  (where  $R$ ,  $\Delta n$ , and  $d$  represents the optical path difference, birefringence and thickness, respectively).

### Calculation Details

First-principle calculations on the electronic structures and optical properties of these three compounds were carried out using the total energy plane-wave pseudopotential method implemented in the CASTEP module in the Material Studio 7.0. The Perdew–Burke–Ernzerhof (PBE) functional within the generalized gradient approximation was adopted as the exchange–correlation potential during the calculation. The following electrons were treated as valence electrons: Li  $2s^1$ , Na  $2p^6 3s^1$ , Rb  $4s^2 4p^6 5s^1$ , Sr  $4s^2 4p^6 5s^2$ , Y  $4d^1 5s^2$ , B  $2s^2 2p^1$ , O  $2s^2 2p^4$ , and O  $2s^2 2p^4$ . The plane-wave basis set energy cutoff was set at 810.0eV for  $\text{LiNa}_2\text{Y}(\text{BO}_3)_2$ ,  $\text{RbNa}_2\text{Y}(\text{BO}_3)_2$ , and  $\text{RbSrY}(\text{BO}_3)_2$  compounds. The k point sampling in the Brillouin zone was set as  $5 \times 4 \times 3$ ,  $4 \times 5 \times 3$  and  $5 \times 6 \times 4$  for  $\text{LiNa}_2\text{Y}(\text{BO}_3)_2$ ,  $\text{RbNa}_2\text{Y}(\text{BO}_3)_2$ , and  $\text{RbSrY}(\text{BO}_3)_2$ . Our test showed that these parameters make good convergence in the present studies.

The linear-optical properties for these three compounds were obtained through the dielectric function  $\varepsilon(\omega) = \varepsilon_1(\omega) + i\varepsilon_2(\omega)$ . The imaginary part of the dielectric function  $\varepsilon_2$  is illustrated in the following equation:

$$\varepsilon_2(\mathbf{q} \rightarrow \mathbf{O}_u, \hbar\omega) = \frac{2e^2\pi}{\Omega\varepsilon_0} \sum_{\mathbf{k}c\nu} \left| \langle \varphi_{\mathbf{k}}^c | \mathbf{u} \cdot \mathbf{r} | \varphi_{\mathbf{k}}^\nu \rangle \right|^2 \delta[E_{\mathbf{k}}^c - E_{\mathbf{k}}^\nu - E]$$

(Where  $e$  represents the elementary charge,  $\hbar$  represents Planck's constant,  $\mathbf{u}$  represents the vector of the incident polarization,  $\mathbf{r}$  represents the position operator,  $\Omega$  represents the unit cell volume,  $\varepsilon_0$  represents the dielectric

---

constant, and  $\varphi_k$  represents the momentum matrix element transition.) The energies of occupied and empty electronic states use  $E_k^v$  and  $E_k^c$ , respectively. On the basis of the imaginary part, the real part can be obtained using the Kramers–Kronig transformation. Then the refractive index and the birefringence was obtained from the realpart of the dielectric function.

In addition, the electronic population was calculated by LCAO-MO Molecular Wave Functions as implanted in the Mulliken population analysis method.

**Table S1** Crystal data and structure refinements for three compounds.

| Empirical formula                               | <b>LiNa<sub>2</sub>Y(BO<sub>3</sub>)<sub>2</sub></b> | <b>RbNa<sub>2</sub>Y(BO<sub>3</sub>)<sub>2</sub></b> | <b>RbSrY(BO<sub>3</sub>)<sub>2</sub></b> |
|-------------------------------------------------|------------------------------------------------------|------------------------------------------------------|------------------------------------------|
| Formula weight (g/mol)                          | 259.44                                               | 337.97                                               | 379.62                                   |
| Crystal system                                  | Monoclinic                                           | Orthorhombic                                         | Monoclinic                               |
| Space group                                     | <i>P</i> 2 <sub>1</sub> / <i>n</i>                   | <i>Pnma</i>                                          | <i>P</i> 2 <sub>1</sub> / <i>m</i>       |
| Z                                               | 4                                                    | 8                                                    | 2                                        |
| Unit cell dimensions                            | a = 6.321(4) Å                                       | a=8.6912(15) Å                                       | a=6.639(4) Å                             |
|                                                 | b = 8.886(5) Å                                       | b=6.8243(14) Å                                       | b=5.404(3) Å                             |
|                                                 | c = 9.707(5) Å                                       | c=11.0304(17) Å                                      | c=8.592(5) Å                             |
|                                                 | β = 97.37(2)°                                        |                                                      | B = 105.560(18)°                         |
| V (Å <sup>3</sup> )                             | 540.7(6)                                             | 654.2(2)                                             | 297.0(3)                                 |
| D <sub>c</sub> (g·cm <sup>-3</sup> )            | 3.187                                                | 3.431                                                | 4.246                                    |
| Absorption coefficient(mm <sup>-1</sup> )       | 10.906                                               | 16.410                                               | 26.811                                   |
| F(000)                                          | 488                                                  | 624                                                  | 344.0                                    |
| Goodness-of-fit on F <sup>2</sup>               | 1.040                                                | 1.036                                                | 1.080                                    |
| Independent reflections                         | 1236                                                 | 812                                                  | 763                                      |
| R <sub>int</sub>                                | 0.0584                                               | 0.087                                                | 0.0671                                   |
| R <sub>1</sub> , wR <sub>2</sub> (I > 2σ(I))[a] | 0.0298, 0.0668                                       | 0.0425, 0.0962                                       | 0.0522, 0.1306                           |
| R <sub>1</sub> , wR <sub>2</sub> (all data)     | 0.0387, 0.0707                                       | 0.0666, 0.1064                                       | 0.0819, 0.1485                           |
| Largest diff. peak and hole                     | 0.576 and -0.926                                     | 1.401 and -1.057                                     | 1.512 and -1.706                         |

[a]R<sub>1</sub> = Σ||F<sub>o</sub>|-|F<sub>c</sub>||/Σ|F<sub>o</sub>|. [b]wR<sub>2</sub> = [Σw(F<sub>o</sub><sup>2</sup>-F<sub>c</sub><sup>2</sup>)<sup>2</sup>/Σw(F<sub>o</sub><sup>2</sup>)<sup>2</sup>]<sup>1/2</sup>.

**Table S2** Atomic coordinates ( $\times 10^4$ ) and equivalent isotropic displacement parameters ( $\text{\AA}^2 \times 10^3$ ),  $U_{\text{eq}}$  is defined as one third of the trace of the orthogonalized  $U_{ij}$  tensor.

| Atom                                                 | x         | y        | z         | U(eq) | BVS  |
|------------------------------------------------------|-----------|----------|-----------|-------|------|
| <b>LiNa<sub>2</sub>Y(BO<sub>3</sub>)<sub>2</sub></b> |           |          |           |       |      |
| Y(1)                                                 | 8403(1)   | 8403(1)  | 3505(1)   | 6(1)  | 3.09 |
| Na(1)                                                | -72(3)    | 2982(2)  | 976(2)    | 17(1) | 1.02 |
| Na(2)                                                | 1931(4)   | 4474(2)  | 3966(2)   | 44(1) | 1.06 |
| O(1)                                                 | 7035(4)   | 3364(3)  | 2406(3)   | 9(1)  | 1.82 |
| O(2)                                                 | 1756(4)   | 2192(3)  | 3057(3)   | 14(1) | 2.05 |
| O(3)                                                 | 4833(4)   | 626(3)   | 3198(3)   | 14(1) | 2.03 |
| O(4)                                                 | 1756(4)   | -116(3)  | 3198(3)   | 15(1) | 1.93 |
| O(5)                                                 | 8053(5)   | 3190(3)  | 4847(3)   | 13(1) | 2.01 |
| O(6)                                                 | 6557(5)   | 5489(3)  | 4847(3)   | 20(1) | 1.99 |
| B(1)                                                 | 2830(7)   | 911(4)   | 3509(4)   | 20(1) | 2.98 |
| B(2)                                                 | 7182(7)   | 4031(5)  | 3715(4)   | 10(1) | 2.94 |
| Li(1)                                                | 4257(13)  | 2552(9)  | 1694(7)   | 23(2) | 0.96 |
| <b>RbNa<sub>2</sub>Y(BO<sub>3</sub>)<sub>2</sub></b> |           |          |           |       |      |
| Y(1)                                                 | 1309(1)   | 7500     | 6724(1)   | 11(1) | 3.28 |
| Rb(1)                                                | 5616(1)   | 7500     | 3580(1)   | 25(1) | 1.11 |
| Na(1)                                                | 8039(3)   | 9944(4)  | 5825(3)   | 18(1) | 0.79 |
| B(1)                                                 | 4415(15)  | 7500     | 6258(11)  | 18(2) | 2.89 |
| B(2)                                                 | 855(13)   | 2500     | 6115(10)  | 13(2) | 2.98 |
| O(1)                                                 | 5998(8)   | 7500     | 6151(6)   | 20(2) | 1.91 |
| O(2)                                                 | 3362(8)   | 7500     | 5345(6)   | 22(2) | 1.97 |
| O(3)                                                 | 1288(6)   | 4232(7)  | 6647(5)   | 22(1) | 2.01 |
| O(4)                                                 | -6(9)     | 2500     | 5069(6)   | 22(2) | 1.98 |
| O(5)                                                 | 3827(8)   | 7500     | 7455(6)   | 23(2) | 2.01 |
| <b>RbSrY(BO<sub>3</sub>)<sub>2</sub></b>             |           |          |           |       |      |
| Y(1)                                                 | 7404(2)   | 7500     | 2480(1)   | 11(1) | 3.26 |
| Sr(1)                                                | 3222(2)   | 7500     | 4587(1)   | 15(1) | 1.75 |
| Rb(1)                                                | 1708(2)   | 7500     | 291(1)    | 19(1) | 1.09 |
| B(1)                                                 | 10870(20) | 2500     | 3530(14)  | 9(2)  | 3.01 |
| B(2)                                                 | 5760(20)  | 7500     | -1750(16) | 13(3) | 3.01 |
| O(1)                                                 | 9988(10)  | 4706(12) | 2891(8)   | 26(2) | 2.01 |
| O(2)                                                 | 12522(13) | 2500     | 4866(10)  | 21(2) | 2.11 |

---

|      |          |           |          |       |      |
|------|----------|-----------|----------|-------|------|
| O(3) | 6924(13) | 7500      | -188(10) | 23(2) | 2.14 |
| O(4) | 4935(9)  | 10316(11) | 2534(7)  | 18(1) | 2.09 |

---



**Table S3** Selected bond distances (Å) and angles (deg.).

| <b>LiNa<sub>2</sub>Y(BO<sub>3</sub>)<sub>2</sub></b> |            |                     |            |
|------------------------------------------------------|------------|---------------------|------------|
| Y(1)-O(3)                                            | 2.266(3)   | O(3)-Y(1)-O(6)#1    | 88.57(11)  |
| Y(1)-O(6)#1                                          | 2.291(3)   | O(3)-Y(1)-O(4)#2    | 84.75(10)  |
| Y(1)-O(4)#2                                          | 2.338(3)   | O(6)#1-Y(1)-O(4)#2  | 147.94(11) |
| Y(1)-O(5)                                            | 2.352(3)   | O(3)-Y(1)-O(5)      | 92.12(10)  |
| Y(1)-O(4)#3                                          | 2.375(3)   | O(6)#1-Y(1)-O(5)    | 136.34(9)  |
| Y(1)-O(1)                                            | 2.447(3)   | O(4)#2-Y(1)-O(5)    | 75.34(10)  |
| Y(1)-O(2)#3                                          | 2.450(3)   | O(3)-Y(1)-O(4)#3    | 144.01(10) |
| Y(1)-O(1)#1                                          | 2.523(3)   | O(6)#1-Y(1)-O(4)#3  | 95.04(11)  |
| Na(1)-O(2)                                           | 2.303(3)   | O(4)#2-Y(1)-O(4)#3  | 73.38(11)  |
| Na(1)-O(6)#4                                         | 2.427(3)   | O(5)-Y(1)-O(4)#3    | 108.91(10) |
| Na(1)-O(1)#5                                         | 2.457(3)   | O(3)-Y(1)-O(1)      | 77.53(10)  |
| Na(1)-O(3)#6                                         | 2.480(3)   | O(6)#1-Y(1)-O(1)    | 78.29(10)  |
| Na(1)-O(5)#7                                         | 2.597(3)   | O(4)#2-Y(1)-O(1)    | 130.11(9)  |
| Na(1)-O(4)#6                                         | 2.723(3)   | O(5)-Y(1)-O(1)      | 59.40(9)   |
| Na(1)-O(3)#7                                         | 2.961(3)   | O(4)#3-Y(1)-O(1)    | 138.26(9)  |
| Na(2)-O(2)                                           | 2.208(3)   | O(3)-Y(1)-O(2)#3    | 155.82(10) |
| Na(2)-O(6)#8                                         | 2.254(4)   | O(6)#1-Y(1)-O(2)#3  | 78.22(10)  |
| Na(2)-O(5)#8                                         | 2.374(3)   | O(4)#2-Y(1)-O(2)#3  | 116.96(10) |
| Na(2)-O(3)#6                                         | 2.470(4)   | O(5)-Y(1)-O(2)#3    | 83.99(10)  |
| Na(2)-O(5)#5                                         | 2.929(4)   | O(4)#3-Y(1)-O(2)#3  | 58.40(10)  |
| O(1)-B(2)                                            | 1.394(5)   | O(1)-Y(1)-O(2)#3    | 79.99(10)  |
| O(1)-Li(1)                                           | 1.942(9)   | O(3)-Y(1)-O(1)#1    | 75.30(9)   |
| O(2)-B(1)                                            | 1.368(5)   | O(6)#1-Y(1)-O(1)#1  | 58.60(9)   |
| O(2)-Li(1)                                           | 2.211(8)   | O(4)#2-Y(1)-O(1)#1  | 89.40(10)  |
| O(3)-B(1)                                            | 1.362(5)   | O(5)-Y(1)-O(1)#1    | 161.19(9)  |
| O(3)-Li(1)                                           | 2.248(8)   | O(4)#3-Y(1)-O(1)#1  | 76.24(10)  |
| O(4)-B(1)                                            | 1.391(5)   | O(1)-Y(1)-O(1)#1    | 128.80(4)  |
| O(4)-Li(1)#4                                         | 2.322(8)   | O(2)#3-Y(1)-O(1)#1  | 113.18(9)  |
| O(5)-B(2)                                            | 1.383(5)   | O(2)-Na(1)-O(6)#4   | 78.47(11)  |
| O(5)-Li(1)#9                                         | 1.970(8)   | O(2)-Na(1)-O(1)#5   | 82.71(11)  |
| O(6)-B(2)                                            | 1.360(5)   | O(6)#4-Na(1)-O(1)#5 | 75.60(10)  |
| O(2)-Na(1)-O(3)#6                                    | 90.13(11)  | O(5)#8-Na(2)-O(3)#6 | 91.37(12)  |
| O(6)#4-Na(1)-O(3)#6                                  | 147.57(12) | O(2)-Na(2)-O(5)#5   | 76.00(11)  |

|                     |            |                     |            |
|---------------------|------------|---------------------|------------|
| O(1)#5-Na(1)-O(3)#6 | 72.87(10)  | O(6)#8-Na(2)-O(5)#5 | 89.57(13)  |
| O(2)-Na(1)-O(5)#7   | 85.69(11)  | O(5)#8-Na(2)-O(5)#5 | 98.66(11)  |
| O(6)#4-Na(1)-O(5)#7 | 89.74(11)  | O(3)#6-Na(2)-O(5)#5 | 96.10(12)  |
| O(1)#5-Na(1)-O(5)#7 | 162.85(10) | O(3)-B(1)-O(2)      | 121.4(3)   |
| O(3)#6-Na(1)-O(5)#7 | 119.87(11) | O(3)-B(1)-O(4)      | 121.4(3)   |
| O(2)-Na(1)-O(4)#6   | 87.40(11)  | O(2)-B(1)-O(4)      | 117.2(3)   |
| O(6)#4-Na(1)-O(4)#6 | 152.17(12) | O(6)-B(2)-O(5)      | 123.7(4)   |
| O(1)#5-Na(1)-O(4)#6 | 126.58(11) | O(6)-B(2)-O(1)      | 118.3(3)   |
| O(3)#6-Na(1)-O(4)#6 | 54.73(9)   | O(5)-B(2)-O(1)      | 117.9(3)   |
| O(5)#7-Na(1)-O(4)#6 | 65.16(10)  | O(1)-Li(1)-O(5)#7   | 132.4(4)   |
| O(2)-Na(1)-O(3)#7   | 151.06(12) | O(1)-Li(1)-O(2)     | 121.6(4)   |
| O(6)#4-Na(1)-O(3)#7 | 119.98(10) | O(5)#7-Li(1)-O(2)   | 105.9(4)   |
| O(1)#5-Na(1)-O(3)#7 | 121.80(10) | O(1)-Li(1)-O(3)     | 89.3(3)    |
| O(3)#6-Na(1)-O(3)#7 | 83.79(10)  | O(5)#7-Li(1)-O(3)   | 110.4(4)   |
| O(5)#7-Na(1)-O(3)#7 | 73.18(9)   | O(2)-Li(1)-O(3)     | 64.6(2)    |
| O(4)#6-Na(1)-O(3)#7 | 66.02(9)   | O(1)-Li(1)-O(4)#6   | 90.0(3)    |
| Li(1)-Na(1)-O(3)#7  | 101.04(17) | O(5)#7-Li(1)-O(4)#6 | 83.4(3)    |
| O(2)-Na(2)-O(6)#8   | 113.03(13) | O(2)-Li(1)-O(4)#6   | 100.5(3)   |
| O(2)-Na(2)-O(5)#8   | 173.63(14) | O(3)-Li(1)-O(4)#6   | 161.6(4)   |
| O(6)#8-Na(2)-O(5)#8 | 62.95(11)  | O(6)#8-Na(2)-O(3)#6 | 154.28(13) |
| O(2)-Na(2)-O(3)#6   | 92.67(12)  |                     |            |

---

**RbNa<sub>2</sub>Y(BO<sub>3</sub>)<sub>2</sub>**

---

|               |          |                    |           |
|---------------|----------|--------------------|-----------|
| Y(1)-O(3)     | 2.232(4) | O(3)-Y(1)-O(3)#1   | 175.5(3)  |
| Y(1)-O(3)#1   | 2.232(4) | O(3)-Y(1)-O(4)#2   | 87.86(13) |
| Y(1)-O(4)#2   | 2.279(7) | O(3)#1-Y(1)-O(4)#2 | 87.86(13) |
| Y(1)-O(5)     | 2.332(7) | O(3)-Y(1)-O(5)     | 91.21(14) |
| Y(1)-O(5)#3   | 2.340(7) | O(3)#1-Y(1)-O(5)   | 91.21(14) |
| Y(1)-O(2)     | 2.344(7) | O(4)#2-Y(1)-O(5)   | 140.0(3)  |
| Y(1)-O(1)#3   | 2.360(7) | O(3)-Y(1)-O(5)#3   | 90.41(14) |
| Rb(1)-O(2)    | 2.762(7) | O(3)#1-Y(1)-O(5)#3 | 90.41(14) |
| Rb(1)-O(1)    | 2.855(7) | O(4)#2-Y(1)-O(5)#3 | 83.0(3)   |
| Rb(1)-O(3)#7  | 2.947(5) | O(5)-Y(1)-O(5)#3   | 137.00(4) |
| Rb(1)-O(3)#8  | 2.947(5) | O(3)-Y(1)-O(2)     | 88.95(14) |
| Rb(1)-O(3)#9  | 2.950(5) | O(3)#1-Y(1)-O(2)   | 88.94(14) |
| Rb(1)-O(3)#10 | 2.950(5) | O(4)#2-Y(1)-O(2)   | 79.4(3)   |

---

|                       |            |                      |            |
|-----------------------|------------|----------------------|------------|
| Rb(1)-O(5)#10         | 3.631(2)   | O(5)-Y(1)-O(2)       | 60.7(2)    |
| Na(1)-O(1)            | 2.461(6)   | O(5)#3-Y(1)-O(2)     | 162.3(2)   |
| Na(1)-O(2)#5          | 2.488(5)   | O(3)-Y(1)-O(1)#3     | 92.12(13)  |
| Na(1)-O(4)#11         | 2.574(7)   | O(3)#1-Y(1)-O(1)#3   | 92.12(13)  |
| Na(1)-O(4)#10         | 2.584(7)   | O(4)#2-Y(1)-O(1)#3   | 143.6(3)   |
| Na(1)-O(5)#12         | 2.617(6)   | O(5)-Y(1)-O(1)#3     | 76.4(2)    |
| Na(1)-O(3)#9          | 2.831(6)   | O(5)#3-Y(1)-O(1)#3   | 60.6(2)    |
| Na(1)-O(3)#13         | 3.019(6)   | O(2)-Y(1)-O(1)#3     | 137.0(2)   |
| B(1)-O(2)             | 1.361(14)  | O(2)-Rb(1)-O(1)      | 51.9(2)    |
| B(1)-O(1)             | 1.381(14)  | O(2)-Rb(1)-O(3)#7    | 96.43(16)  |
| B(1)-O(5)             | 1.415(13)  | O(1)-Rb(1)-O(3)#7    | 141.65(15) |
| B(2)-O(3)#14          | 1.372(7)   | O(2)-Rb(1)-O(3)#8    | 96.43(16)  |
| B(2)-O(3)             | 1.372(7)   | O(1)-Rb(1)-O(3)#8    | 141.65(15) |
| B(2)-O(4)             | 1.375(13)  | O(3)#7-Rb(1)-O(3)#8  | 47.29(18)  |
| O(1)-Na(1)-O(2)#5     | 101.4(2)   | O(2)-Rb(1)-O(3)#9    | 134.98(15) |
| O(1)-Na(1)-O(4)#11    | 169.2(2)   | O(1)-Rb(1)-O(3)#9    | 88.75(17)  |
| O(2)#5-Na(1)-O(4)#11  | 71.3(2)    | O(3)#7-Rb(1)-O(3)#9  | 127.70(10) |
| O(1)-Na(1)-O(4)#10    | 95.47(19)  | O(3)#8-Rb(1)-O(3)#9  | 106.87(12) |
| O(2)#5-Na(1)-O(4)#10  | 125.3(2)   | O(2)-Rb(1)-O(3)#10   | 134.98(15) |
| O(4)#11-Na(1)-O(4)#10 | 82.92(9)   | O(1)-Rb(1)-O(3)#10   | 88.75(17)  |
| O(1)-Na(1)-O(5)#12    | 69.6(2)    | O(3)#7-Rb(1)-O(3)#10 | 106.87(12) |
| O(2)#5-Na(1)-O(5)#12  | 162.0(3)   | O(3)#8-Rb(1)-O(3)#10 | 127.70(10) |
| O(4)#11-Na(1)-O(5)#12 | 119.6(2)   | O(3)#9-Rb(1)-O(3)#10 | 47.23(18)  |
| O(4)#10-Na(1)-O(5)#12 | 72.1(2)    | O(2)-Rb(1)-O(1)      | 51.9(2)    |
| O(1)-Na(1)-O(3)#9     | 100.0(2)   | O(2)-Rb(1)-O(3)#7    | 96.43(16)  |
| O(2)#5-Na(1)-O(3)#9   | 73.83(19)  | O(1)-Rb(1)-O(3)#7    | 141.65(15) |
| O(4)#11-Na(1)-O(3)#9  | 70.59(18)  | O(2)-Rb(1)-O(3)#8    | 96.43(16)  |
| O(4)#10-Na(1)-O(3)#9  | 52.03(18)  | O(1)-Rb(1)-O(3)#8    | 141.65(15) |
| O(5)#12-Na(1)-O(3)#9  | 122.32(19) | O(3)#7-Rb(1)-O(3)#8  | 47.29(18)  |
| O(1)-Na(1)-O(3)#13    | 139.18(19) | O(2)-B(1)-O(1)       | 127.4(10)  |
| O(2)#5-Na(1)-O(3)#13  | 118.86(18) | O(2)-B(1)-O(5)       | 116.6(10)  |
| O(4)#11-Na(1)-O(3)#13 | 49.72(18)  | O(1)-B(1)-O(5)       | 116.1(10)  |
| O(4)#10-Na(1)-O(3)#13 | 67.41(18)  | O(3)#14-B(2)-O(3)    | 119.0(9)   |
| O(5)#12-Na(1)-O(3)#13 | 69.90(18)  | O(3)#14-B(2)-O(4)    | 120.5(4)   |
| O(3)#9-Na(1)-O(3)#13  | 97.33(16)  | O(3)-B(2)-O(4)       | 120.5(4)   |

---

---

---

**RbSrY(BO<sub>3</sub>)<sub>2</sub>**

---

|                     |           |                      |            |
|---------------------|-----------|----------------------|------------|
| Y(1)-O(3)           | 2.228(9)  | O(3)-Y(1)-O(1)       | 93.1(2)    |
| Y(1)-O(1)           | 2.241(6)  | O(3)-Y(1)-O(1)#1     | 93.1(2)    |
| Y(1)-O(1)#1         | 2.241(7)  | O(1)-Y(1)-O(1)#1     | 84.7(3)    |
| Y(1)-O(4)           | 2.246(6)  | O(3)-Y(1)-O(4)       | 96.7(2)    |
| Y(1)-O(4)#1         | 2.246(6)  | O(1)-Y(1)-O(4)       | 170.2(2)   |
| Y(1)-O(2)#2         | 2.267(9)  | O(1)#1-Y(1)-O(4)     | 94.1(2)    |
| Sr(1)-O(1)#7        | 2.709(6)  | O(3)-Y(1)-O(4)#1     | 96.7(2)    |
| Sr(1)-O(1)#8        | 2.709(6)  | O(1)-Y(1)-O(4)#1     | 94.1(2)    |
| Sr(1)-O(4)#5        | 2.717(6)  | O(1)#1-Y(1)-O(4)#1   | 170.2(2)   |
| Sr(1)-O(4)#9        | 2.717(6)  | O(4)-Y(1)-O(4)#1     | 85.3(3)    |
| Sr(1)-O(2)#2        | 2.737(9)  | O(3)-Y(1)-O(2)#2     | 173.3(3)   |
| Sr(1)-O(2)#7        | 2.763(2)  | O(1)-Y(1)-O(2)#2     | 91.9(2)    |
| Sr(1)-O(2)#10       | 2.763(2)  | O(1)#1-Y(1)-O(2)#2   | 91.9(2)    |
| Sr(1)-O(4)          | 2.793(6)  | O(4)-Y(1)-O(2)#2     | 78.4(2)    |
| Sr(1)-O(4)#1        | 2.793(6)  | O(4)#1-Y(1)-O(2)#2   | 78.4(2)    |
| Rb(1)-O(3)#4        | 2.859(3)  | O(1)#7-Sr(1)-O(1)#8  | 67.8(3)    |
| Rb(1)-O(3)#3        | 2.859(3)  | O(1)#7-Sr(1)-O(4)#5  | 146.1(2)   |
| Rb(1)-O(4)#1        | 2.899(6)  | O(1)#8-Sr(1)-O(4)#5  | 110.25(17) |
| Rb(1)-O(4)          | 2.899(6)  | O(1)#7-Sr(1)-O(4)#9  | 110.25(17) |
| Rb(1)-O(1)#3        | 2.917(7)  | O(1)#8-Sr(1)-O(4)#9  | 146.1(2)   |
| Rb(1)-O(1)#12       | 2.917(7)  | O(4)#5-Sr(1)-O(4)#9  | 51.5(2)    |
| Rb(1)-O(3)#7        | 3.091(9)  | O(1)#7-Sr(1)-O(2)#2  | 136.48(17) |
| Rb(1)-O(1)#8        | 3.153(7)  | O(1)#8-Sr(1)-O(2)#2  | 136.48(17) |
| Rb(1)-O(1)#7        | 3.153(7)  | O(4)#5-Sr(1)-O(2)#2  | 69.6(2)    |
| B(1)-O(2)           | 1.360(13) | O(4)#9-Sr(1)-O(2)#2  | 69.6(2)    |
| B(1)-O(1)#13        | 1.375(8)  | O(1)#7-Sr(1)-O(2)#7  | 51.2(2)    |
| B(1)-O(1)           | 1.375(8)  | O(1)#8-Sr(1)-O(2)#7  | 117.7(2)   |
| B(2)-O(3)           | 1.356(14) | O(4)#5-Sr(1)-O(2)#7  | 113.0(2)   |
| B(2)-O(4)#14        | 1.376(8)  | O(4)#9-Sr(1)-O(2)#7  | 62.7(2)    |
| B(2)-O(4)#4         | 1.376(8)  | O(2)#2-Sr(1)-O(2)#7  | 100.08(17) |
| O(3)#4-Rb(1)-O(3)#3 | 141.8(3)  | O(1)#7-Sr(1)-O(2)#10 | 117.7(2)   |
| O(3)#4-Rb(1)-O(4)#1 | 109.4(2)  | O(1)#8-Sr(1)-O(2)#10 | 51.2(2)    |
| O(3)#3-Rb(1)-O(4)#1 | 48.7(2)   | O(4)#5-Sr(1)-O(2)#10 | 62.7(2)    |
| O(3)#4-Rb(1)-O(4)   | 48.7(2)   | O(4)#9-Sr(1)-O(2)#10 | 113.0(2)   |

---

|                      |            |                      |            |
|----------------------|------------|----------------------|------------|
| O(3)#3-Rb(1)-O(4)    | 109.4(2)   | O(2)#2-Sr(1)-O(2)#10 | 100.08(18) |
| O(4)#1-Rb(1)-O(4)    | 63.3(2)    | O(2)#7-Sr(1)-O(2)#10 | 155.9(4)   |
| O(3)#4-Rb(1)-O(1)#3  | 113.8(2)   | O(1)#7-Sr(1)-O(4)    | 111.24(18) |
| O(3)#3-Rb(1)-O(1)#3  | 68.3(2)    | O(1)#8-Sr(1)-O(4)    | 75.79(19)  |
| O(4)#1-Rb(1)-O(1)#3  | 116.04(16) | O(4)#5-Sr(1)-O(4)    | 100.26(16) |
| O(4)-Rb(1)-O(1)#3    | 150.22(19) | O(4)#9-Sr(1)-O(4)    | 130.66(10) |
| O(3)#4-Rb(1)-O(1)#12 | 68.3(2)    | O(2)#2-Sr(1)-O(4)    | 62.08(19)  |
| O(3)#3-Rb(1)-O(1)#12 | 113.8(2)   | O(2)#7-Sr(1)-O(4)    | 134.0(2)   |
| O(4)#1-Rb(1)-O(1)#12 | 150.22(19) | O(2)#10-Sr(1)-O(4)   | 68.2(2)    |
| O(4)-Rb(1)-O(1)#12   | 116.04(16) | O(1)#7-Sr(1)-O(4)#1  | 75.79(19)  |
| O(1)#3-Rb(1)-O(1)#12 | 48.2(3)    | O(1)#8-Sr(1)-O(4)#1  | 111.24(18) |
| O(3)#4-Rb(1)-O(3)#7  | 108.62(17) | O(4)#5-Sr(1)-O(4)#1  | 130.66(10) |
| O(3)#3-Rb(1)-O(3)#7  | 108.62(17) | O(4)#9-Sr(1)-O(4)#1  | 100.26(16) |
| O(4)#1-Rb(1)-O(3)#7  | 129.66(17) | O(2)#2-Sr(1)-O(4)#1  | 62.08(19)  |
| O(4)-Rb(1)-O(3)#7    | 129.66(17) | O(2)#7-Sr(1)-O(4)#1  | 68.2(2)    |
| O(1)#3-Rb(1)-O(3)#7  | 75.57(19)  | O(2)#10-Sr(1)-O(4)#1 | 134.0(2)   |
| O(1)#12-Rb(1)-O(3)#7 | 75.57(19)  | O(4)-Sr(1)-O(4)#1    | 66.0(2)    |
| O(3)#4-Rb(1)-O(1)#8  | 75.4(2)    | O(1)#3-Rb(1)-O(1)#7  | 110.25(14) |
| O(3)#3-Rb(1)-O(1)#8  | 130.8(2)   | O(1)#12-Rb(1)-O(1)#7 | 137.52(9)  |
| O(4)#1-Rb(1)-O(1)#8  | 97.13(17)  | O(3)#7-Rb(1)-O(1)#7  | 62.60(18)  |
| O(4)-Rb(1)-O(1)#8    | 67.75(18)  | O(1)#8-Rb(1)-O(1)#7  | 57.2(2)    |
| O(1)#3-Rb(1)-O(1)#8  | 137.52(9)  | O(2)-B(1)-O(1)#13    | 119.8(5)   |
| O(1)#12-Rb(1)-O(1)#8 | 110.25(14) | O(2)-B(1)-O(1)       | 119.8(5)   |
| O(3)#7-Rb(1)-O(1)#8  | 62.60(18)  | O(1)#13-B(1)-O(1)    | 120.1(10)  |
| O(3)#4-Rb(1)-O(1)#7  | 130.8(2)   | O(3)-B(2)-O(4)#14    | 120.8(5)   |
| O(3)#3-Rb(1)-O(1)#7  | 75.4(2)    | O(3)-B(2)-O(4)#4     | 120.8(5)   |
| O(4)#1-Rb(1)-O(1)#7  | 67.75(18)  | O(4)#14-B(2)-O(4)#4  | 118.1(10)  |
| O(4)-Rb(1)-O(1)#7    | 97.13(17)  |                      |            |

---

Symmetry transformations used to generate equivalent atoms:

**LiNa<sub>2</sub>Y(BO<sub>3</sub>)<sub>2</sub>**

#1 -x+3/2,y-1/2,-z+1/2    #2 -x+1,-y,-z+1    #3 x+1,y,z  
 #4 -x+1/2,y-1/2,-z+1/2    #5 x-1,y,z    #6 -x+1/2,y+1/2,-z+1/2  
 #7 x-1/2,-y+1/2,z-1/2    #8 -x+1,-y+1,-z+1    #9 x+1/2,-y+1/2,z+1/2

---

#10  $-x+3/2, y+1/2, -z+1/2$

**RbNa<sub>2</sub>Y(BO<sub>3</sub>)<sub>2</sub>**

#1  $x, -y+3/2, z$  #2  $-x, -y+1, -z+1$  #3  $x-1/2, y, -z+3/2$

#4  $-x+1, y-1/2, -z+1$  #5  $-x+1, -y+2, -z+1$  #6  $x-1, -y+3/2, z$

#7  $-x+1/2, -y+1, z-1/2$  #8  $-x+1/2, y+1/2, z-1/2$  #9  $-x+1, y+1/2, -z+1$

#10  $-x+1, -y+1, -z+1$  #11  $x+1, y+1, z$  #12  $x+1/2, y, -z+3/2$

#13  $x+1, -y+3/2, z$  #14  $x, -y+1/2, z$  #15  $x+1, y, z$

#16  $-x+1/2, -y+1, z+1/2$  #17  $x-1, y-1, z$  #18  $x-1/2, -y+3/2, -z+3/2$

**RbSrY(BO<sub>3</sub>)<sub>2</sub>**

#1  $x, -y+3/2, z$  #2  $-x+2, -y+1, -z+1$  #3  $-x+1, -y+1, -z$

#4  $-x+1, -y+2, -z$  #5  $-x+1, -y+2, -z+1$  #6  $-x+1, -y+1, -z+1$

#7  $x-1, y, z$  #8  $x-1, -y+3/2, z$  #9  $-x+1, y-1/2, -z+1$

#10  $x-1, y+1, z$  #11  $x, y, z+1$  #12  $-x+1, y+1/2, -z$

#13  $x, -y+1/2, z$  #14  $-x+1, y-1/2, -z$  #15  $x+1, y, z$

#16  $x+1, y-1, z$  #17  $x, y, z-1$

**Table S4** Summary of Y-based borates with isolated BO<sub>3</sub>.

| Compound                                                                      | Space group             | Birefringence | $\lambda_{\text{cut-off}}$ |
|-------------------------------------------------------------------------------|-------------------------|---------------|----------------------------|
| LiNa <sub>2</sub> Y(BO <sub>3</sub> ) <sub>2</sub> <sup>This work</sup>       | <i>P2<sub>1</sub>/n</i> | 0.017@532nm   | <190nm                     |
| RbNa <sub>2</sub> Y(BO <sub>3</sub> ) <sub>2</sub> <sup>This work</sup>       | <i>Pnma</i>             | 0.033@532nm   | <190nm                     |
| RbSrY(BO <sub>3</sub> ) <sub>2</sub> <sup>This work</sup>                     | <i>P2<sub>1</sub>/m</i> | 0.07@532nm    | <190nm                     |
| LiRb <sub>2</sub> Y(BO <sub>3</sub> ) <sub>2</sub>                            | <i>Pbcm</i>             | 0.038@532nm   | <190nm                     |
| CaRbY(BO <sub>3</sub> ) <sub>2</sub>                                          | <i>Pbca</i>             | 0.048@532nm   | <190nm                     |
| YCa <sub>4</sub> O(BO <sub>3</sub> ) <sub>3</sub>                             | <i>Cm</i>               | 0.04@532nm    | 200nm                      |
| Na <sub>3</sub> Y <sub>3</sub> (BO <sub>3</sub> ) <sub>4</sub>                | <i>P6<sub>3</sub>mc</i> | 0.035@400nm   | /                          |
| YAl <sub>3</sub> (BO <sub>3</sub> ) <sub>4</sub>                              | <i>R32</i>              | 0.07@546nm    | 170nm                      |
| Li <sub>2</sub> RbY <sub>4</sub> (BO <sub>3</sub> ) <sub>5</sub>              | <i>P2<sub>1</sub>/n</i> | 0.10@532nm    | <190nm                     |
| Li <sub>2</sub> CsY <sub>4</sub> (BO <sub>3</sub> ) <sub>5</sub>              | <i>P2<sub>1</sub>/n</i> | 0.10@532nm    | <190nm                     |
| LiCaY <sub>5</sub> (BO <sub>3</sub> ) <sub>6</sub>                            | <i>P6<sub>5</sub>22</i> | /             | /                          |
| Na <sub>2</sub> Y <sub>2</sub> B <sub>2</sub> O <sub>7</sub>                  | <i>P2<sub>1</sub>/c</i> | /             | /                          |
| Li <sub>3</sub> K <sub>3</sub> Y <sub>7</sub> (BO <sub>3</sub> ) <sub>9</sub> | <i>Pna2<sub>1</sub></i> | /             | /                          |
| $\beta$ -Ba <sub>3</sub> YB <sub>3</sub> O <sub>9</sub>                       | <i>R-3</i>              | /             | /                          |
| $\alpha$ -Ba <sub>3</sub> YB <sub>3</sub> O <sub>9</sub>                      | <i>P6<sub>3</sub>cm</i> | /             | /                          |
| Li <sub>3</sub> Y(BO <sub>3</sub> ) <sub>2</sub>                              | <i>P2<sub>1</sub>/c</i> | /             | /                          |
| Li <sub>2</sub> KY(BO <sub>3</sub> ) <sub>2</sub>                             | <i>P2<sub>1</sub>/n</i> | /             | /                          |
| K <sub>3</sub> Y(BO <sub>3</sub> ) <sub>2</sub>                               | <i>Pnnm</i>             | /             | /                          |
| K <sub>3</sub> Y <sub>3</sub> (BO <sub>3</sub> ) <sub>4</sub>                 | <i>P2<sub>1</sub>/c</i> | /             | /                          |
| Ba <sub>2</sub> Y(BO <sub>3</sub> ) <sub>2</sub> Cl                           | <i>P2<sub>1</sub>/m</i> | /             | /                          |
| Sr <sub>3</sub> Y(BO <sub>3</sub> ) <sub>3</sub>                              | <i>R-3</i>              | /             | /                          |
| Sr <sub>3</sub> Y <sub>2</sub> (BO <sub>3</sub> ) <sub>4</sub>                | <i>Pc2<sub>1</sub>n</i> | /             | /                          |
| Ba <sub>3</sub> Y <sub>2</sub> (BO <sub>3</sub> ) <sub>4</sub>                | <i>Pnma</i>             | /             | /                          |
| Li <sub>6</sub> Y(BO <sub>3</sub> ) <sub>3</sub>                              | <i>P2<sub>1</sub>/c</i> | /             | /                          |
| Rb <sub>3</sub> Y <sub>2</sub> (BO <sub>3</sub> ) <sub>3</sub>                | <i>Pna2<sub>1</sub></i> | /             | /                          |
| CaYBO <sub>4</sub>                                                            | <i>Pnam</i>             | /             | /                          |
| BaYOBO <sub>3</sub>                                                           | <i>P-62m</i>            | /             | <190nm                     |
| KBaY(BO <sub>3</sub> ) <sub>2</sub>                                           | <i>R-3m</i>             | /             | /                          |
| KSrY(BO <sub>3</sub> ) <sub>2</sub>                                           | <i>P2<sub>1</sub>/m</i> | /             | /                          |

**Table S5** Muliken bond population and selected bond distances of  $\text{LiNa}_2\text{Y}(\text{BO}_3)_2$ ,  $\text{RbNa}_2\text{Y}(\text{BO}_3)_2$ , and  $\text{RbSrY}(\text{BO}_3)_2$ .

| <b><math>\text{LiNa}_2\text{Y}(\text{BO}_3)_2</math></b> |                |               | <b><math>\text{RbNa}_2\text{Y}(\text{BO}_3)_2</math></b> |                |               | <b><math>\text{RbSrY}(\text{BO}_3)_2</math></b> |                |               |
|----------------------------------------------------------|----------------|---------------|----------------------------------------------------------|----------------|---------------|-------------------------------------------------|----------------|---------------|
| Bond                                                     | Popu<br>lation | Lengt<br>h(Å) | Bond                                                     | Popu<br>lation | Lengt<br>h(Å) | Bond                                            | Popu<br>lation | Lengt<br>h(Å) |
| B2-O6                                                    | 0.93           | 1.360         | B1-O2                                                    | 0.92           | 1.361         | B2-O3                                           | 0.91           | 1.357         |
| B1-O3                                                    | 0.90           | 1.362         | B2-O3                                                    | 0.92           | 1.372         | B1-O2                                           | 0.81           | 1.358         |
| B1-O2                                                    | 0.90           | 1.368         | B2-O3                                                    | 0.92           | 1.372         | B1-O1                                           | 0.83           | 1.376         |
| B2-O5                                                    | 0.87           | 1.383         | B2-O4                                                    | 0.85           | 1.375         | B1-O1                                           | 0.83           | 1.376         |
| B1-O4                                                    | 0.85           | 1.391         | B1-O1                                                    | 0.90           | 1.381         | B2-O4                                           | 0.85           | 1.376         |
| B2-O1                                                    | 0.85           | 1.394         | B2-O5                                                    | 0.82           | 1.416         | B2-O4                                           | 0.85           | 1.376         |
| Y1-O3                                                    | 0.55           | 2.265         | Y1-O3                                                    | 0.55           | 2.232         | Y1-O3                                           | 0.57           | 2.229         |
| Y1-O6                                                    | 0.27           | 2.291         | Y1-O3                                                    | 0.55           | 2.232         | Y1-O1                                           | 0.48           | 2.241         |
| Y1-O4                                                    | 0.36           | 2.338         | Y1-O4                                                    | 0.41           | 2.379         | Y1-O1                                           | 0.48           | 2.241         |
| Y1-O5                                                    | 0.28           | 2.353         | Y1-O5                                                    | 0.20           | 2.332         | Y1-O4                                           | 0.46           | 2.246         |
| Y1-O4                                                    | 0.22           | 2.375         | Y1-O5                                                    | 0.21           | 2.340         | Y1-O4                                           | 0.46           | 2.246         |
| Y1-O1                                                    | 0.22           | 2.447         | Y1-O2                                                    | 0.19           | 2.344         | Y1-O2                                           | 0.33           | 2.267         |
| Y1-O2                                                    | 0.13           | 2.450         | Y1-O1                                                    | 0.18           | 2.360         |                                                 |                |               |
| Y1-O1                                                    | 0.17           | 2.524         |                                                          |                |               |                                                 |                |               |



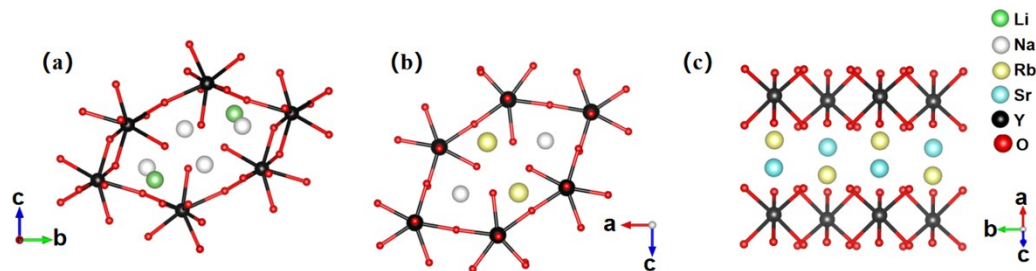

**Fig. S1** The six membered rings in  $\text{LiNa}_2\text{Y}(\text{BO}_3)_2$  (a) and  $\text{RbNa}_2\text{Y}(\text{BO}_3)_2$  (b) or interlayer spaces in  $\text{RbSrY}(\text{BO}_3)_2$  (c).

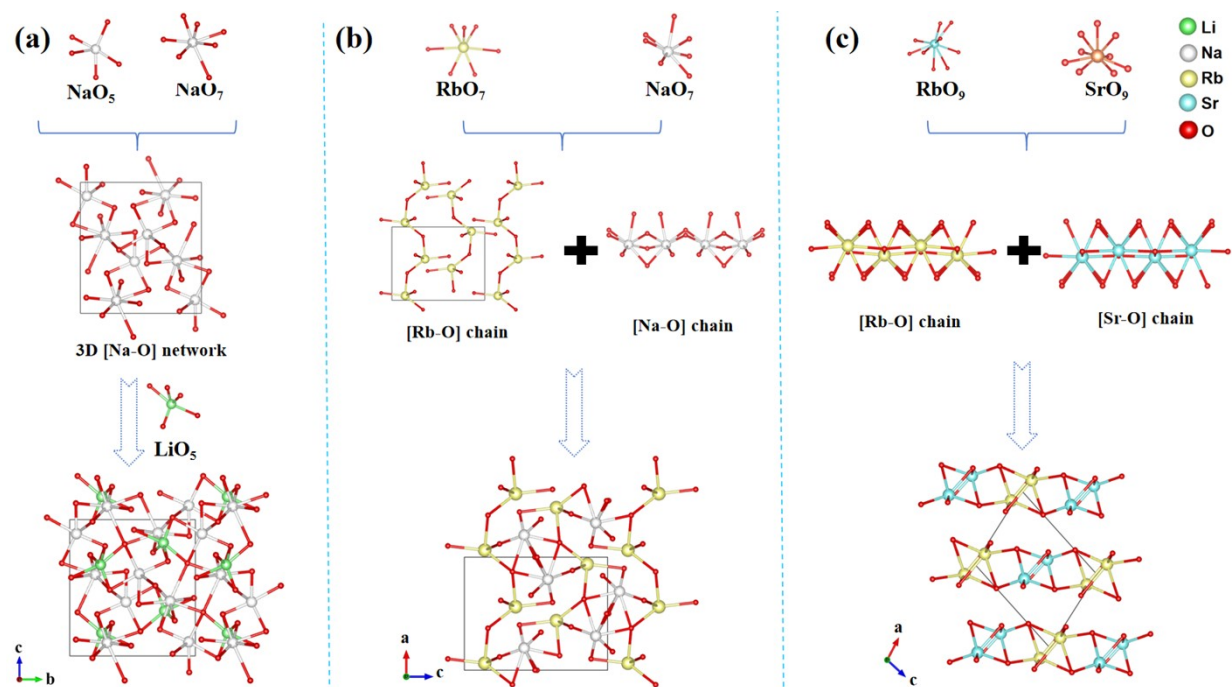

**Fig. S2** Cation coordination environment linkage modes in  $\text{LiNa}_2\text{Y}(\text{BO}_3)_2$  (a),  $\text{RbNa}_2\text{Y}(\text{BO}_3)_2$  (b), and  $\text{RbSrY}(\text{BO}_3)_2$  (c).

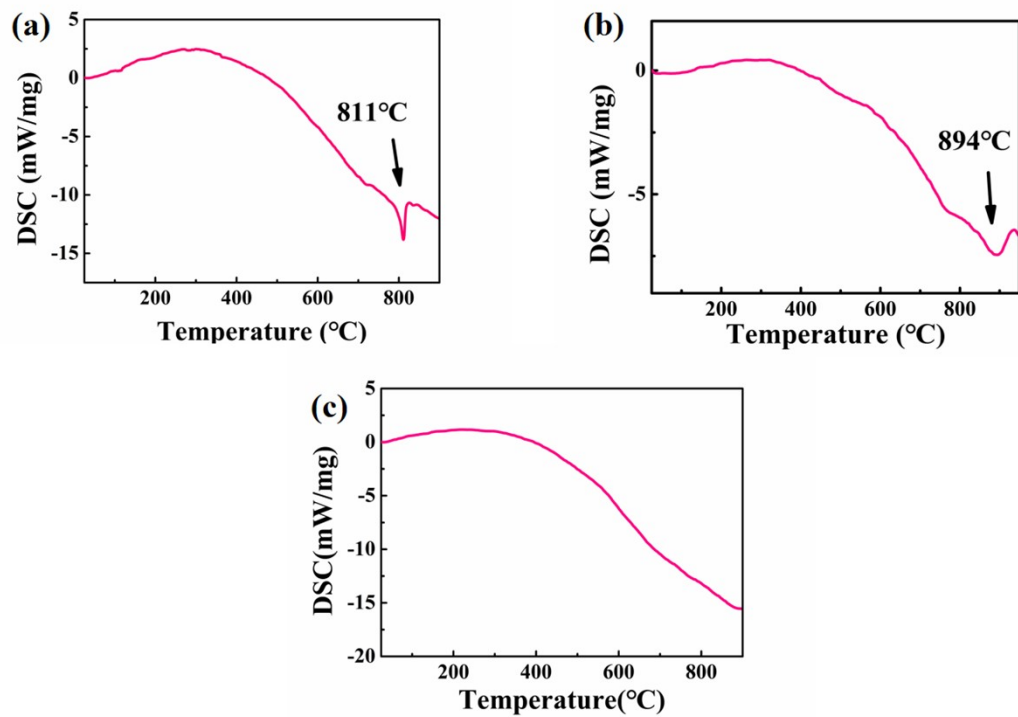

**Fig. S3** DSC curves of  $\text{LiNa}_2\text{Y}(\text{BO}_3)_2$  (a),  $\text{RbNa}_2\text{Y}(\text{BO}_3)_2$  (b), and  $\text{RbSrY}(\text{BO}_3)_2$  (c).

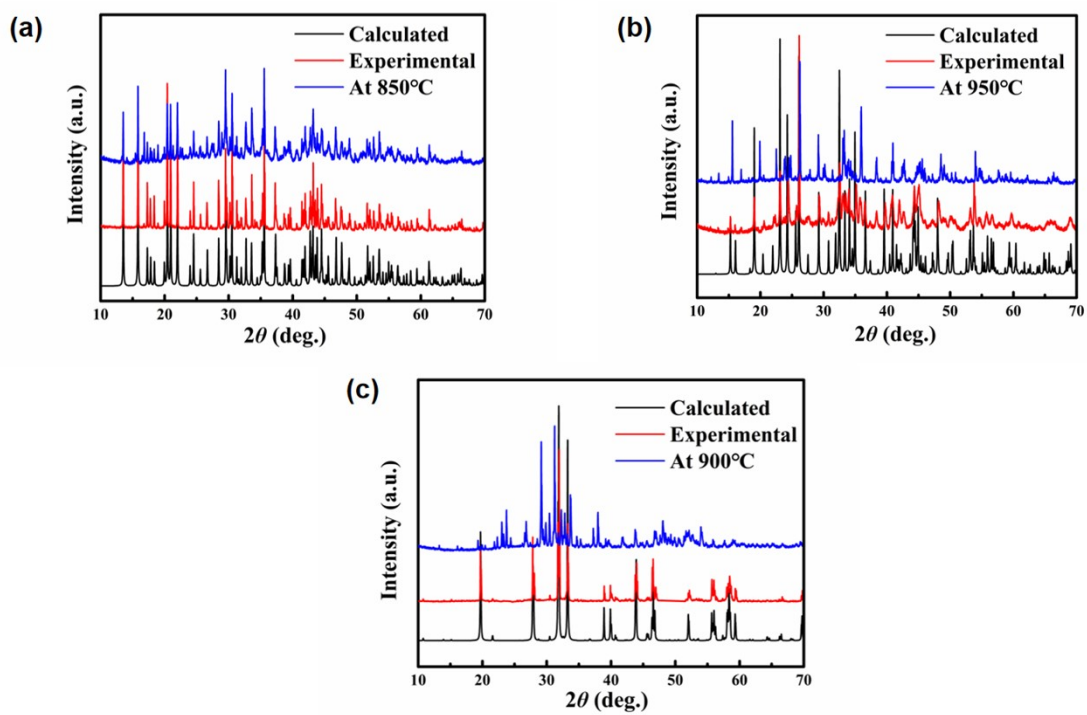

**Fig. S4** X-ray powder diffraction patterns of  $\text{LiNa}_2\text{Y}(\text{BO}_3)_2$  (a),  $\text{RbNa}_2\text{Y}(\text{BO}_3)_2$  (b), and  $\text{RbSrY}(\text{BO}_3)_2$  (c).

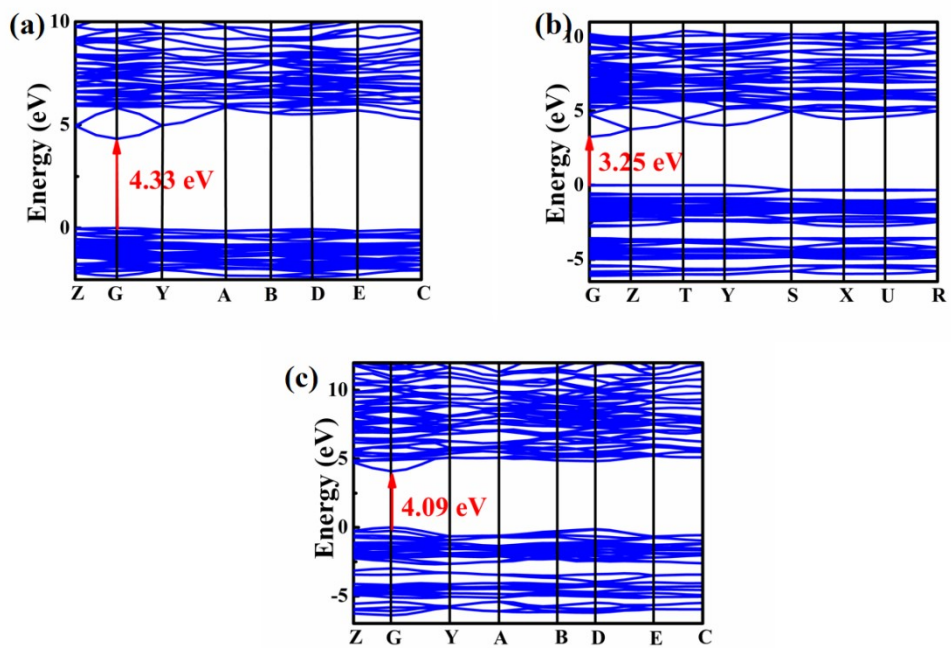

**Fig. S5** Calculated band structures of  $\text{LiNa}_2\text{Y}(\text{BO}_3)_2$ (a),  $\text{RbNa}_2\text{Y}(\text{BO}_3)_2$ (b), and  $\text{RbSrY}(\text{BO}_3)_2$  (c).

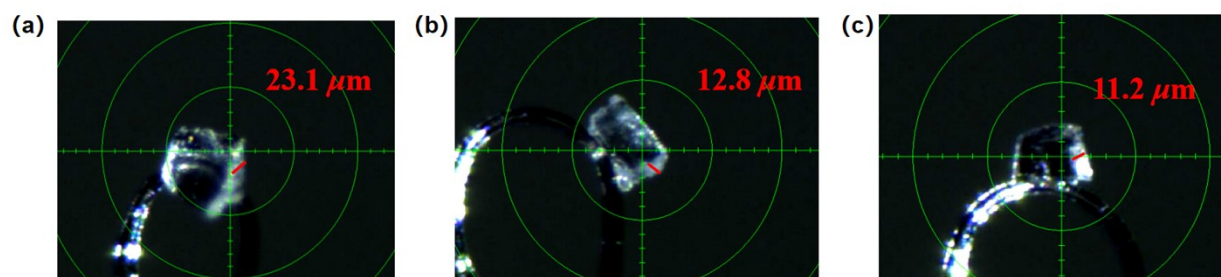

**Fig. S6** Thickness of  $\text{LiNa}_2\text{Y}(\text{BO}_3)_2$  (a),  $\text{RbNa}_2\text{Y}(\text{BO}_3)_2$  (b), and  $\text{RbSrY}(\text{BO}_3)_2$  (c).
